# Supplementary material
Source: publisher figshare collection journal article supplement (https://rs.figshare.com/ndownloader/files/17890586)
Supplement: Supplementary file 1 [file 17890586]

## Sheet: Sheet1
Supplementary Table 1: List of samples used in this study. Taxonomy follows International Ornithological Checklist v. 8.2 (Gill and Donsker 2018). Institutional abbreviations: AMNH, American Museum of Natural History; FMNH, Field Museum of Natural History; KUNHM, University of Kansas Biodiversity Institute; LSUMZ, Louisiana State University Museum of Natural Science; MSB, Museum of Southwestern B…
Genus	Species	Subspecies	Institution	Voucher	Source	UCE acession number	Data Source	RapidGenomics or at UNM	Platform	Reads	Total UCE BP	Mean length	95 CI length	Min	Max	# loci	specimen link
Leptosomus	discolor		NCBI	32000	Genbank	-	Jarvis et al. 2014	-	-	-	5331331	1105	1.14	208	1782	4858
Apaloderma	vittatum		NCBI	32169	Genbank	-	Jarvis et al. 2014	-	-	-	5261601	1107	1.06	275	1783	4795
Buceros	rhinoceros		NCBI	32403	Genbank	-	Jarvis et al. 2014	-	-	-	5188623	1095	1.36	201	1785	4776
Picoides	pubescens		NCBI	32059	Genbank	-	Jarvis et al. 2014	-	-	-	5096019	1093	1.36	210	1784	4728
Coracias	abyssinicus		KUNHM	15413	tissue	SAMN07822843	Andersen et al. 2018	RG	Hiseq 2500	3735713	1836099	544	3.07	224	1521	3374
Coracias	benghalensis		AMNH	7954	tissue	SAMN10715794	this study	UNM	Hiseq 3000	9545136	4523013	1040	3.42	231	2352	4347
Coracias	caudatus		AMNH	5862	tissue	SAMN10715795	this study	UNM	Hiseq 3000	6226470	5093076	1181	4.51	226	2332	4314
Coracias	cyanogaster		AMNH	16542	tissue	SAMN10715796	this study	UNM	Hiseq 3000	6540369	5445431	1266	4.86	230	2617	4301
Coracias	garrulus		MSB	30064	tissue	SAMN10715797	this study	UNM	Hiseq 3000	4330480	4969562	1166	4.84	224	2480	4262	http://arctos.database.museum/guid/MSB:Bird:30064
Coracias	naevius		UWBM	95050	tissue	SAMN10715798	this study	UNM	Hiseq 3000	5241879	4473018	1040	4.39	225	2123	4303
Coracias	spatulatus		FMNH	455389	tissue	SAMN10715799	this study	UNM	Hiseq 3000	2700521	4611385	1131	4.84	224	2436	4076
Coracias	temminckii1		FMNH	87664	skin	SAMN10715800	this study	UNM	Hiseq 3000	1406563	492498	283	1.25	224	866	1739
Eurystomus	azureus		USNM	572400	skin	SAMN10715801	this study	UNM	Hiseq 3000	11421712	4211741	908	2.8	228	1842	4636
Eurystomus	glaucurus		UWBM	104389	tissue	SAMN10715802	this study	UNM	Hiseq 3000	1970077	3223836	792	4.11	224	2068	4070
Eurystomus	gularis		FMNH	396463	tissue	SAMN10715803	this study	UNM	Hiseq 3000	6092314	5345144	1305	5.3	225	2794	4095
Eurystomus	orientalis		KUNHM	18232	tissue	SAMN10715804	this study	RG	Hiseq 2500	4677520	2213927	631	3.59	224	1563	3507
Atelornis	crossleyi		AMNH	19371	tissue	SAMN07822836	Andersen et al. 2018	RG	Hiseq 2500	5626964	5097168	1160	4.25	225	2095	4393
Atelornis	pittoides		AMNH	19373	tissue	SAMN10715805	this study	UNM	Hiseq 3000	6734795	5351050	1258	4.85	228	2504	4252
Brachypteracias	leptosomus		FMNH	438658	tissue	SAMN10715806	this study	UNM	Hiseq 3000	8882981	5611146	1317	4.66	230	2678	4259
Geobiastes	squamiger		FMNH	384758	tissue	SAMN10715807	this study	UNM	Hiseq 3000	10303689	6346523	1507	5.62	229	3312	4210
Uratelornis	chimaera		AMNH	411213	skin	SAMN10715808	this study	UNM	Hiseq 3000	2430018	1646813	431	1.44	224	1066	3825
Meropogon	forsteni		AMNH	299315	skin	SAMN10715809	this study	UNM	Hiseq 3000	1727320	1583000	421	1.44	224	1396	3761
Merops	albicollis		FMNH	396449	tissue	SAMN10715810	this study	UNM	Hiseq 3000	5196360	5236370	1246	5.21	229	2733	4204
Merops	apiaster		MSB	30071	tissue	SAMN10715811	this study	UNM	Hiseq 3000	3665591	4205452	991	4.78	224	2215	4243	http://arctos.database.museum/guid/MSB:Bird:30071
Merops	boehmi		FMNH	455385	tissue	SAMN10715812	this study	UNM	Hiseq 3000	8347094	5973942	1365	4.98	239	2547	4377
Merops	breweri		USNM	627698	tissue	SAMN10715813	this study	UNM	Hiseq 3000	6169107	5984321	1430	6.18	224	2920	4184
Merops	bullockoides		MSB	30066	tissue	SAMN10715814	this study	UNM	Hiseq 3000	2033529	3436148	814	4.08	224	1972	4219	http://arctos.database.museum/guid/MSB:Bird:30066
Merops	bulocki		KUNHM	15398	tissue	SAMN10715815	this study	RG	Hiseq 2500	2092877	1503900	541	3.66	224	1554	2779
Merops	gularis		KUNHM	8526	tissue	SAMN10715816	this study	UNM	Hiseq 3000	5985790	5395910	1325	5.57	227	2798	4071
Merops	hirundineus		UWBM	101445	tissue	SAMN10715817	this study	UNM	Hiseq 3000	5064739	5241842	1237	5.11	225	1932	4239
Merops	leschenaulti		AMNH	812115	skin	SAMN10715818	this study	UNM	Hiseq 3000	6307475	1852317	435	1.31	224	1549	4257
Merops	malimbicus		USNM	630885	tissue	SAMN10715819	this study	UNM	Hiseq 3000	6625559	5923558	1430	6.27	224	3046	4143
Merops	mentalis		AMNH	827455	skin	SAMN10715820	this study	UNM	Hiseq 3000	7200559	2925188	1189	2.09	224	1575	4325
Merops	muelleri		AMNH	2560	tissue	SAMN10715821	this study	UNM	Hiseq 3000	6609345	5141981	659	4.74	224	2447	4440
Merops	nubicoides		UWBM	57051	tissue	SAMN10715822	this study	UNM	Hiseq 3000	5117082	4139237	978	4.29	224	2021	4233
Merops	nubicus		AMNH	642335	skin	SAMN10715823	this study	UNM	Hiseq 3000	3332939	1309307	334	0.96	224	1026	3916
Merops	oreobates		FMNH	431095	tissue	SAMN10715824	this study	UNM	Hiseq 3000	8349249	5362686	1265	4.96	225	2794	4238
Merops	orientalis		USNM	620424	tissue	SAMN10715825	this study	UNM	Hiseq 3000	8655755	5467030	1295	5.04	224	2302	4222
Merops	ornatus		AMNH	19747	tissue	SAMN10715826	this study	UNM	Hiseq 3000	11356594	5994625	1403	5.29	233	2363	4272
Merops	persicus		LSU	56947	tissue	SAMN10715827	this study	UNM	Hiseq 3000	4868327	5008824	1161	4.89	227	2318	4316
Merops	philippinus		KUNHM	31027	tissue	SAMN10715828	this study	UNM	Hiseq 3000	5998161	2974468	699	3.34	224	1917	4255
Merops	pusillus		AMNH	10651	tissue	SAMN10715829	this study	UNM	Hiseq 3000	6332606	5247358	1237	4.67	225	2507	4241
Merops	revoilii1		FMNH	369641	skin	SAMN10715830	this study	UNM	Hiseq 3000	2801038	1027095	308	0.95	224	1011	3335
Merops	superciliosus		FMNH	384686	tissue	SAMN10715831	this study	UNM	Hiseq 3000	9247785	5358902	1238	4.55	224	2284	4327
Merops	variegatus		AMNH	2154	tissue	SAMN10715832	this study	UNM	Hiseq 3000	14196678	5955338	1392	4.85	227	3365	4279
Merops	viridis	americanus	KUNHM	27326	tissue	SAMN10715833	this study	UNM	Hiseq 3000	8280078	5825975	1380	5.52	225	2947	4223
Merops	viridis	viridis	AMNH	15043	tissue	SAMN10715834	this study	UNM	Hiseq 3000	5502499	4811256	1150	4.78	225	2659	4182
Nyctyornis	amictus		KUNHM	17789	tissue	SAMN10715835	this study	RG	Hiseq 2500	607651	908786	480	3.95	224	1372	1894
Nyctyornis	athertoni		ANWC	34770	tissue	SAMN10715836	this study	UNM	Hiseq 3000	4189414	4261565	993	3.49	232	1992	4290
Todus	angustirostris		KUNHM	8053	tissue	SAMN07822856	Andersen et al. 2018	RG	Hiseq 2500	2650058	1598772	518	3.13	224	1343	3084
Todus	mexicanus		MSB	21984	tissue	SAMN10715837	this study	UNM	Hiseq 3000	6835130	4761634	1134	4.4	224	2563	4198	http://arctos.database.museum/guid/MSB:Bird:21984
Todus	multicolor		LSU	82991	tissue	SAMN10715838	this study	UNM	Hiseq 3000	4447901	3907092	938	4.12	224	1902	4166
Todus	subulatus		KUNHM	8104	tissue	SAMN10715839	this study	RG	Hiseq 2500	1835186	1610179	555	3.68	224	1329	2899
Todus	todus		FMNH	331069	tissue	SAMN10715840	this study	UNM	Hiseq 3000	4271402	5338794	1244	5.34	224	3824	4291
Aspatha	gularis		KUNHM	9432	tissue	SAMN10715841	this study	RG	Hiseq 2500	3970234	1520925	496	2.95	224	1349	3065
Baryphthengus	martii		MSB	27648	tissue	SAMN10715842	this study	UNM	Hiseq 3000	7862941	2742406	1238	7.33	228	2947	2216	http://arctos.database.museum/guid/MSB:Bird:27648
Baryphthengus	ruficapillus		KUNHM	3633	tissue	SAMN10715843	this study	UNM	Hiseq 3000	7184817	5356186	1357	5.94	227	2667	3947
Eumomota	superciliosa		UWBM	100663	tissue	SAMN10715844	this study	UNM	Hiseq 3000	7759957	5165973	1265	5.14	224	2401	4085
Electron	carinatum		LSU	60710	tissue	SAMN10715845	this study	UNM	Hiseq 3000	6073351	5437029	1310	5.69	225	2300	4152
Electron	platyrhynchum		MSB	27817	tissue	SAMN10715846	this study	UNM	Hiseq 3000	2923074	2924243	1143	7.18	224	2087	2558	http://arctos.database.museum/guid/MSB:Bird:27817
Hylomanes	momotula		KUNHM	2182	tissue	SAMN07822847	Andersen et al. 2018	RG	Hiseq 2500	5751419	2176399	637	3.85	224	1553	3415
Momotus	aequatorialis		MSB	36688	tissue	SAMN10715847	this study	UNM	Hiseq 3000	2936608	3541929	906	4.77	224	2008	3911	http://arctos.database.museum/guid/MSB:Bird:36688
Momotus	bahamensis		LSU	69333	tissue	SAMN10715848	this study	UNM	Hiseq 3000	7688998	5576096	1303	5.11	231	2348	4281
Momotus	coeruliceps		UNAM	427	tissue	SAMN10715849	this study	UNM	Hiseq 3000	1195639	2626939	606	2.34	224	1668	4337
Momotus	lessonii		KUNHM	5341	tissue	SAMN10715850	this study	UNM	Hiseq 3000	2059435	2875086	662	2.63	225	1442	4340
Momotus	mexicanus		UWBM	114494	tissue	SAMN10715851	this study	UNM	Hiseq 3000	2640304	4784530	1131	5.16	228	2198	4229
Momotus	momota	momota	LSU	35504	tissue	SAMN10715852	this study	UNM	Hiseq 3000	4654502	5121860	1199	4.91	227	2263	4272
Momotus	momota	microstephanus	FMNH	456580	tissue	SAMN10715853	this study	UNM	Hiseq 3000	4299928	5489653	1330	6.42	226	2455	4128
Momotus	subrufescens		UWBM	108166	tissue	SAMN10715854	this study	UNM	Hiseq 3000	13686828	5528767	1298	4.9	225	2796	4260
Actenoides	bougainvillei1		AMNH	640159	skin	SAMN10715855	this study	UNM	Hiseq 3000	4314716	1073888	324	1.06	224	1444	3311
Actenoides	capucinus		AMNH	299294	skin	SAMN10715856	this study	UNM	Hiseq 3000	3348199	1440705	362	1.09	224	1571	3978
Actenoides	concretus		KUNHM	21931	tissue	SAMN10715857	this study	RG	Hiseq 2500	717456	1135003	486	3.48	224	1454	2337
Actenoides	excelsus		AMNH	840533	tissue	SAMN10715858	this study	RG	Hiseq 2500	2499694	1132316	473	3.29	224	1341	2394
Actenoides	hombroni		KUNHM	19202	tissue	SAMN10715859	this study	RG	Hiseq 2500	2747448	1790634	542	3.17	224	1542	3302
Actenoides	lindsayi		KUNHM	19371	tissue	SAMN07822836	Andersen et al. 2018	UNM	Hiseq 3000	4302455	1872333	563	3.42	224	1622	3324
Actenoides	monachus		AMNH	299291	skin	SAMN10715860	this study	UNM	Hiseq 3000	5502546	2278800	508	1.52	229	1176	4488
Actenoides	princeps		AMNH	299286	skin	SAMN10715861	this study	UNM	Hiseq 3000	2983482	1765213	420	1.34	224	1336	4200
Alcedo	atthis		AMNH	165	tissue	SAMN10715862	this study	RG	Hiseq 2500	5730573	1907508	556	3.21	224	1578	3433
Alcedo	atthis		KUNHM	23444	tissue	SAMN10715863	this study	RG	Hiseq 2500	3086396	1906946	656	4.95	224	1817	2908
Alcedo	atthis		WAM	22763	tissue	SAMN07822837	Andersen et al. 2018	RG	Hiseq 2500	5411566	2236846	653	3.93	224	1829	3425
Alcedo	coerulescens		ANWC	47173	skin	SAMN10715864	this study	UNM	Hiseq 3000	4611359	1851296	444	1.41	226	1551	4174
Alcedo	euryzona		AMNH	487	tissue	SAMN10715865	this study	RG	Hiseq 2500	6039713	2028299	588	3.54	224	1636	3447
Alcedo	euryzona		UWBM	67494	tissue	SAMN10715866	this study	RG	Hiseq 2500	2235613	1527435	541	3.55	224	1572	2823
Alcedo	hercules		KUNHM	10160	tissue	SAMN10715867	this study	RG	Hiseq 2500	3156601	1723183	540	3.28	224	1585	3194
Alcedo	meninting		KUNHM	17720	tissue	SAMN10715868	this study	RG	Hiseq 2500	3960540	1923067	579	3.56	224	1838	3320
Alcedo	quadribrachys		KUNHM	20004	tissue	SAMN10715869	this study	RG	Hiseq 2500	5554176	2139865	615	3.58	224	1666	3481
Alcedo	semitorquata		UWBM	95253	tissue	SAMN10715870	this study	RG	Hiseq 2500	4869034	1386756	577	4.51	224	1530	3075
Caridonax	fulgidus		WAM	22673	tissue	SAMN07822838	Andersen et al. 2018	RG	Hiseq 2500	2451675	1731023	549	3.43	224	1544	3155
Ceryle	rudis		USNM	28977	tissue	SAMN07822839	Andersen et al. 2018	RG	Hiseq 2500	1038734	1269652	539	4.02	224	1472	2356
Ceyx	argentatus		KUNHM	19071	tissue	SAMN10715871	this study	RG	Hiseq 2500	5123690	2155654	654	4.22	224	1710	3294
Ceyx	azureus		WAM	24816	tissue	SAMN10715872	this study	RG	Hiseq 2500	5304233	2288242	663	3.91	224	1853	3452
Ceyx	cajeli		AMNH	637134	skin	SAMN10715873	this study	UNM	Hiseq 3000	3197183	1486020	347	0.97	224	1474	4280
Ceyx	collectoris		UWBM	66054	tissue	SAMN07822840	Andersen et al. 2018	RG	Hiseq 2500	11180254	2697247	711	3.81	224	1652	3791
Ceyx	cyanopectus		KUNHM	25661	tissue	SAMN10715874	this study	RG	Hiseq 2500	4014310	1912504	568	3.29	224	1628	3365
Ceyx	dispar		KUNHM	5611	tissue	SAMN10715875	this study	UNM	Hiseq 3000	8472327	4320104	983	3.32	224	1824	4393
Ceyx	erithaca		KUNHM	10417	tissue	SAMN10715876	this study	UNM	Hiseq 3000	5240979	2064089	616	3.56	224	1724	3351
Ceyx	erithaca		WAM	22719	tissue	SAMN10715877	this study	UNM	Hiseq 3000	1015879	1246812	495	3.27	224	1470	2518
Ceyx	fallax		AMNH	299259	skin	SAMN10715878	this study	UNM	Hiseq 3000	2035281	1199633	319	0.94	224	967	3761
Ceyx	flumenicola		KUNHM	20939	tissue	SAMN10715879	this study	RG	Hiseq 2500	4441930	1914199	530	2.75	224	1582	3609
Ceyx	gentianus		KUNHM	13540	tissue	SAMN10715880	this study	RG	Hiseq 2500	2169963	1574527	534	3.45	224	1472	2951
Ceyx	lepidus		AMNH	637099	skin	SAMN10715881	this study	UNM	Hiseq 3000	1408960	1134737	305	0.84	224	865	3718
Ceyx	malaitae		UWBM	66089	tissue	SAMN10715882	this study	RG	Hiseq 2500	3608617	1552802	578	4.25	224	1524	2688
Ceyx	margarethae		KUNHM	19259	tissue	SAMN10715883	this study	RG	Hiseq 2500	716838	1067543	481	3.59	224	1307	2221
Ceyx	meeki	meeki	AMNH	6641	tissue	SAMN10715884	this study	RG	Hiseq 2500	5487368	2267049	685	4.44	224	1775	3309
Ceyx	meeki	pallidus	KUNHM	32075	tissue	SAMN10715885	this study	UNM	Hiseq 3000	14028942	6071299	1443	5.43	240	2437	4207
Ceyx	melanurus	melanurus	KUNHM	20200	tissue	SAMN10715886	this study	RG	Hiseq 2500	2558152	1875365	648	3.22	224	1604	2838
Ceyx	melanurus	mindanensis	KUNHM	18127	tissue	SAMN10715887	this study	RG	Hiseq 2500	3216908	1838296	560	4.98	224	1791	3346
Ceyx	melanurus	samarensis	KUNHM	31654	tissue	SAMN10715888	this study	UNM	Hiseq 3000	5131301	6423965	1548	5.56	240	2930	4150
Ceyx	mulcatus		AMNH	20033	tissue	SAMN10715889	this study	RG	Hiseq 2500	820972	1123241	474	3.29	224	1134	2370
Ceyx	nigromaxilla		KUNHM	15893	tissue	SAMN10715890	this study	RG	Hiseq 2500	6284137	2088564	608	3.49	224	1667	3437
Ceyx	pusillus		WAM	24772	tissue	SAMN10715891	this study	RG	Hiseq 2500	5901439	2085747	616	3.7	224	1599	3385
Ceyx	sacerdotis		AMNH	19862	tissue	SAMN10715892	this study	RG	Hiseq 2500	2941818	1834530	569	3.35	224	1577	3224
Ceyx	solitarius		AMNH	19845	tissue	SAMN10715893	this study	UNM	Hiseq 3000	9583816	5224566	1223	4.33	227	2189	4273
Ceyx	uropygialis		YPM	74989	skin	SAMN10715894	this study	UNM	Hiseq 3000	7653740	2832459	633	2.03	224	1636	4474
Ceyx	wallacii		AMNH	637152	skin	SAMN10715895	this study	UNM	Hiseq 3000	2575682	1381800	333	0.93	224	1317	4152
Ceyx	websteri		USNM	4042	tissue	SAMN10715896	this study	RG	Hiseq 2500	5561410	2384574	674	4.02	224	1712	3536
Chloroceryle	aenea		KUNHM	5791	tissue	SAMN10715897	this study	RG	Hiseq 2500	3763495	1937046	596	3.7	224	3476	3248
Chloroceryle	amazona		AMNH	6180	tissue	SAMN10715898	this study	RG	Hiseq 2500	4956249	2015683	586	3.39	224	1494	3439
Chloroceryle	americana		MSB	34157	tissue	SAMN10715899	this study	RG	Hiseq 2500	2717021	1763037	581	3.72	224	1747	3034	http://arctos.database.museum/guid/MSB:Bird:34157
Chloroceryle	inda		MSB	37184	tissue	SAMN07822841	Andersen et al. 2018	RG	Hiseq 2500	6458492	1973248	630	4.15	224	1729	3131	http://arctos.database.museum/guid/MSB:Bird:37184
Cittura	cyanotis		AMNH	299227	skin	SAMN10715900	this study	UNM	Hiseq 3000	3633611	1713688	402	1.17	224	1095	4265
Cittura	sanghirensis		AMNH	640345	skin	SAMN10715901	this study	UNM	Hiseq 3000	3037584	1312412	343	1.07	224	902	3827
Clytoceyx	rex		KUNHM	7120	tissue	SAMN07822842	Andersen et al. 2018	RG	Hiseq 2500	3400352	2070141	658	4.4	224	1507	3147
Corythornis	cristatus		KUNHM	15442	tissue	SAMN07822844	Andersen et al. 2018	RG	Hiseq 2500	7686991	2070087	624	3.8	224	1603	3318
Corythornis	leucogaster		KUNHM	29128	tissue	SAMN10715902	this study	RG	Hiseq 2500	2582706	1657592	529	3.22	224	1503	3134
Corythornis	madagascariensis		FMNH	431180	tissue	SAMN10715903	this study	RG	Hiseq 2500	755648	1110461	503	3.92	224	1566	2206
Corythornis	vintsioides		FMNH	431170	tissue	SAMN10715904	this study	RG	Hiseq 2500	4703035	1909112	551	3.09	224	1576	3465
Dacelo	gaudichaud		KUNHM	9180	tissue	SAMN07822845	Andersen et al. 2018	RG	Hiseq 2500	3987735	2026190	597	3.65	224	1546	3393
Dacelo	leachii		ANWC	33378	tissue	SAMN10715905	this study	RG	Hiseq 2500	705396	1077741	490	3.72	224	1415	2200
Dacelo	leachii		ANWC	56231	tissue	SAMN10715906	this study	RG	Hiseq 2500	2821190	1878216	595	3.73	224	1623	3159
Dacelo	novaeguineae		ANWC	29831	tissue	SAMN10715907	this study	RG	Hiseq 2500	3215240	1905371	584	3.59	224	1500	3260
Dacelo	tyro		ANWC	56401	tissue	SAMN10715908	this study	RG	Hiseq 2500	1081918	1262335	499	3.35	224	1498	2532
Halcyon	albiventris		MSB	30063	tissue	SAMN10715909	this study	RG	Hiseq 2500	3359552	1909748	587	3.72	224	1579	3251	http://arctos.database.museum/guid/MSB:Bird:30063
Halcyon	badia		LSU	45151	tissue	SAMN10715910	this study	RG	Hiseq 2500	4708170	1830107	543	3.09	224	1558	3370
Halcyon	chelicuti		KUNHM	26643	tissue	SAMN10715911	this study	RG	Hiseq 2500	951075	1229342	510	3.66	224	1440	2411
Halcyon	coromanda		KUNHM	17710	tissue	SAMN10715912	this study	UNM	Hiseq 3000	3808251	1845092	537	3.06	224	1676	3434
Halcyon	cyanoventris		AMNH	638779	skin	SAMN10715913	this study	UNM	Hiseq 3000	2354914	1303636	321	0.84	224	946	4063
Halcyon	gularis		KUNHM	18119	tissue	SAMN10715914	this study	UNM	Hiseq 3000	10951000	6376396	1458	4.96	224	2668	4374
Halcyon	leucocephala		UWBM	107584	tissue	SAMN10715915	this study	RG	Hiseq 2500	4635405	1920589	625	3.96	224	1658	3072
Halcyon	malimbica		KUNHM	29057	tissue	SAMN10715916	this study	RG	Hiseq 2500	2494459	1644726	530	3.24	224	1365	3104
Halcyon	pileata		IOZ	18911	tissue	SAMN10715917	this study	RG	Hiseq 2500	1795170	1418724	495	2.98	224	1653	2866
Halcyon	senegalensis		KUNHM	19982	tissue	SAMN07822846	Andersen et al. 2018	RG	Hiseq 2500	5089566	2021672	593	3.48	224	1664	3408
Halcyon	senegaloides		AMNH	831543	skin	SAMN10715918	this study	UNM	Hiseq 3000	6434462	2658569	585	1.86	225	2080	4545
Halcyon	smyrnensis		AMNH	17275	tissue	SAMN10715919	this study	UNM	Hiseq 3000	12827891	6401262	1511	5.09	224	2911	4236
Halcyon	smyrnensis		KUNHM	23257	tissue	SAMN10715920	this study	RG	Hiseq 2500	5198200	1945565	571	3.25	224	1712	3408
Ispidina	lecontei		KUNHM	15590	tissue	SAMN07822848	Andersen et al. 2018	RG	Hiseq 2500	4616291	2105302	612	3.57	224	1743	3440
Ispidina	picta		KUNHM	20060	tissue	SAMN10715921	this study	RG	Hiseq 2500	3215791	1837546	578	3.5	224	1686	3178
Lacedo	pulchella		KUNHM	23121	tissue	SAMN07822849	Andersen et al. 2018	RG	Hiseq 2500	3954289	1882412	554	3.16	224	1622	3400
Megaceryle	alcyon		AMNH	16947	tissue	SAMN07822850	Andersen et al. 2018	RG	Hiseq 2500	3466345	1896342	573	3.54	224	1654	3309
Megaceryle	lugubris		IOZ	18907	tissue	SAMN10715922	this study	RG	Hiseq 2500	4395056	1842728	533	3	224	1611	3456
Megaceryle	maxima		KUNHM	19853	tissue	SAMN10715923	this study	RG	Hiseq 2500	667001	983936	466	3.55	224	2215	2113
Megaceryle	torquata		KUNHM	3107	tissue	SAMN10715924	this study	RG	Hiseq 2500	1941227	1525078	518	3.3	224	1456	2943
Melidora	macrorrhina		KUNHM	9561	tissue	SAMN07822851	Andersen et al. 2018	RG	Hiseq 2500	2570057	1645355	527	3.07	224	1512	3123
Pelargopsis	amauroptera		UMMZ	205481	skin	SAMN10715925	this study	UNM	Hiseq 3000	2960246	1434460	346	0.93	224	947	4143
Pelargopsis	capensis		AMNH	11117	tissue	SAMN07822852	Andersen et al. 2018	RG	Hiseq 2500	3199564	1358264	566	4.77	224	4961	2398
Pelargopsis	melanorhyncha		FMNH	87626	skin	SAMN10715926	Andersen et al. 2018	RG	Hiseq 2500	16652498	2318509	531	1.68	227	1753	4370
Syma	megarhyncha		KUNHM	7143	tissue	SAMN07822853	Andersen et al. 2018	RG	Hiseq 2500	4877167	2072681	617	3.66	224	1616	3362
Syma	torotoro		KUNHM	9145	tissue	SAMN10715927	this study	RG	Hiseq 2500	3730425	2050447	655	4.4	224	1716	3129
Tanysiptera	carolinae		AMNH	301326	skin	SAMN10715928	this study	UNM	Hiseq 3000	3346797	1288103	365	1.27	224	1619	3525
Tanysiptera	danae		ANWC	27067	tissue	SAMN10715929	this study	UNM	Hiseq 3000	5897339	4931922	1175	4.6	224	1969	4294
Tanysiptera	ellioti		YPM	75060	skin	SAMN10715930	this study	UNM	Hiseq 3000	7735117	2433672	533	1.51	226	1146	4566
Tanysiptera	galatea		KUNHM	9585	tissue	SAMN10715931	this study	RG	Hiseq 2500	3361726	1639665	581	4.07	224	1603	2820
Tanysiptera	hydrocharis		KUNHM	7591	tissue	SAMN10715932	this study	RG	Hiseq 2500	3040952	1689885	544	3.29	224	1593	3106
Tanysiptera	nigriceps		AMNH	19869	tissue	SAMN10715933	this study	RG	Hiseq 2500	5838446	1911810	571	3.36	224	1450	3346
Tanysiptera	nympha		AMNH	792940	skin	SAMN10715934	this study	UNM	Hiseq 3000	2979030	1563827	390	1.24	224	936	4010
Tanysiptera	riedelii		AMNH	343551	skin	SAMN10715935	this study	UNM	Hiseq 3000	2714828	1428385	358	1.15	224	910	3985
Tanysiptera	sylvia		ANWC	32643	tissue	SAMN07822854	Andersen et al. 2018	RG	Hiseq 2500	7625727	2157567	603	3.38	224	1528	3577
Todiramphus	albicilla		KUNHM	22581	tissue	SAMN10715936	this study	RG	Hiseq 2500	3237214	1832991	541	3.03	225	1552	3391
Todiramphus	albonotatus		AMNH	777918	skin	SAMN10715937	this study	UNM	Hiseq 3000	4464933	1865122	424	1.24	225	1409	4395
Todiramphus	australasia		WAM	25183	tissue	SAMN10715938	this study	UNM	Hiseq 3000	8405149	5514419	1247	4.53	237	2431	4423
Todiramphus	chloris	chloris	KUNHM	18130	tissue	SAMN10715939	this study	RG	Hiseq 2500	5355893	1917380	547	3.12	224	1576	3506
Todiramphus	cinnamominus		USNM	16774	tissue	SAMN10715940	this study	RG	Hiseq 2500	5701942	2204062	613	3.5	224	1764	3596
Todiramphus	colonus		SNZPTKP	2003071	tissue	SAMN10715941	this study	UNM	Hiseq 3000	6817391	5454190	1283	4.95	227	2595	4252
Todiramphus	diops		AMNH	467633	skin	SAMN10715942	this study	UNM	Hiseq 3000	3505107	1637498	388	1.18	224	1538	4221
Todiramphus	enigma		AMNH	639664	skin	SAMN10715943	this study	UNM	Hiseq 3000	1880169	1217191	318	0.9	224	915	3829
Todiramphus	farquhari		AMNH	21376	tissue	SAMN10715944	this study	RG	Hiseq 2500	990566	1137323	489	3.41	224	1591	2324
Todiramphus	funebris		AMNH	467654	skin	SAMN10715945	this study	UNM	Hiseq 3000	4143416	1744272	407	1.19	224	1409	4287
Todiramphus	gertrudae		MHNG	PO3-43	blood	SAMN10715946	this study	UNM	Hiseq 3000	11040044	6315411	1428	5	224	2762	4423
Todiramphus	godeffroyi1		AMNH	195223	skin	SAMN10715947	this study	UNM	Hiseq 3000	2077425	1119077	298	0.81	224	917	3754
Todiramphus	lazuli		AMNH	638835	skin	SAMN10715948	this study	UNM	Hiseq 3000	4200857	1538967	360	0.99	224	1001	4271
Todiramphus	leucopygius		AMNH	6658	tissue	SAMN10715949	this study	RG	Hiseq 2500	7307556	2373141	666	3.82	224	1658	3562
Todiramphus	macleayii		ANWC	33429	tissue	SAMN10715950	this study	RG	Hiseq 2500	4901710	1883133	574	3.47	224	1556	3279
Todiramphus	nigrocyaneus		KUNHM	5294	tissue	SAMN10715951	this study	RG	Hiseq 2500	3859190	2114901	667	4.45	224	1644	3171
Todiramphus	pelewensis		KUNHM	23651	tissue	SAMN10715952	this study	RG	Hiseq 2500	4194504	1819791	520	2.79	224	1581	3498
Todiramphus	pyrrhopygius		ANWC	55348	tissue	SAMN10715953	this study	RG	Hiseq 2500	5427421	1856613	604	3.97	224	1558	3076
Todiramphus	recurvirostris1		KUNHM	104171	skin	SAMN10715954	this study	UNM	Hiseq 3000	5441174	1148630	488	2.57	224	1565	2353
Todiramphus	reichenbachii1		KUNHM	40147	skin	SAMN10715955	this study	UNM	Hiseq 3000	1000685	535548	266	0.99	224	1118	2014
Todiramphus	ruficollaris		UWBM	42805	tissue	SAMN10715956	this study	RG	Hiseq 2500	2658799	1702395	555	3.53	224	1586	3069
Todiramphus	sacer		AMNH	6585	tissue	SAMN10715957	this study	RG	Hiseq 2500	4827844	2257178	642	3.73	224	1575	3516
Todiramphus	sacer	manuae1	KUNHM	107630	skin	SAMN10715958	this study	UNM	Hiseq 3000	1250518	786306	320	1.34	224	718	2459
Todiramphus	sacer	pealei	UWBM	89771	tissue	SAMN10715959	this study	UNM	Hiseq 3000	9958831	6340467	1469	5.65	224	3200	4315
Todiramphus	sanctus		ANWC	56378	tissue	SAMN10715960	this study	RG	Hiseq 2500	5216815	2096158	646	4.08	224	1680	3246
Todiramphus	saurophagus		KUNHM	27804	tissue	SAMN10715961	this study	RG	Hiseq 2500	4688519	1966705	590	3.72	224	1650	3334
Todiramphus	sordidus		ANWC	44295	tissue	SAMN10715962	this study	RG	Hiseq 2500	4984615	2053636	575	3.19	224	1688	3574
Todiramphus	tristrami		AMNH	6704	tissue	SAMN10715963	this study	RG	Hiseq 2500	3629340	2169437	647	4.02	224	1680	3353
Todiramphus	tutus		MHNG	HH7-60	blood	SAMN10715964	this study	UNM	Hiseq 3000	6927011	5134437	1228	6.25	225	2557	4182
Todiramphus	tutus	mauke	UWBM	42604	tissue	SAMN07822855	Andersen et al. 2018	RG	Hiseq 2500	7548087	2252309	617	3.51	224	1674	3653
Todiramphus	veneratus		MHNG	PO2-88	blood	SAMN10715965	this study	UNM	Hiseq 3000	6266758	6732830	1594	6.93	225	3058	4225
Todiramphus	veneratus	youngi	MHNG	HH7-75	blood	SAMN10715966	this study	UNM	Hiseq 3000	6669017	5846746	1422	7.14	224	2437	4113
Todiramphus	winchelli		KUNHM	28186	tissue	SAMN10715967	this study	RG	Hiseq 2500	4248797	1833283	608	4.09	224	1624	3014
Citations
Andersen, M. J., J. M. McCullough, W. M. Mauck, B. T. Smith, and R. G. Moyle. 2018. A phylogeny of kingfishers reveals an Indomalayan origin and elevated rates of diversification on oceanic islands. Journal of Biogeography 45:269–281.
Jarvis, E. D., S. Mirarab, A. J. Aberer, B. Li, P. Houde, C. Li, S. Y. W. Ho, B. C. Faircloth, et al. 2014. Whole-genome analyses resolve early branches in the tree of life of modern birds. Science 346:1320–1331.
